# Supplementary material for: Structural diversity and photocatalytic properties of Cd(ii) coordination polymers constructed by a flexible V-shaped bipyridyl benzene ligand and dicarboxylate derivatives
Source: Royal Society of Chemistry journal article supplement (doi:10.1039/c4dt03271c), 2014-11-19
Supplement: c4dt03271c1.pdf [file c4dt03271c1.pdf]

## **Electronic Supplementary Information**

### **Structural diversity and photocatalytic properties of Cd(II) coordination polymers constructed by a flexible V-shaped bipyridyl benzene ligand and dicarboxylate derivatives**

**Lei-Lei Liu,<sup>\*a</sup> Cai-Xia Yu,<sup>a</sup> Feng-Ji Ma,<sup>a</sup> Ya-Ru Li,<sup>a</sup> Jing-Jing Han,<sup>a</sup> Lu Lin<sup>a</sup> and Lu-Fang Ma<sup>\*b</sup>**

<sup>a</sup> *College of Chemistry and Chemical Engineering, Anyang Normal University, Anyang 455000, Henan, P. R. China*

<sup>b</sup> *College of Chemistry and Chemical Engineering, Luoyang Normal University, Luoyang 471022, Henan, P. R. China*

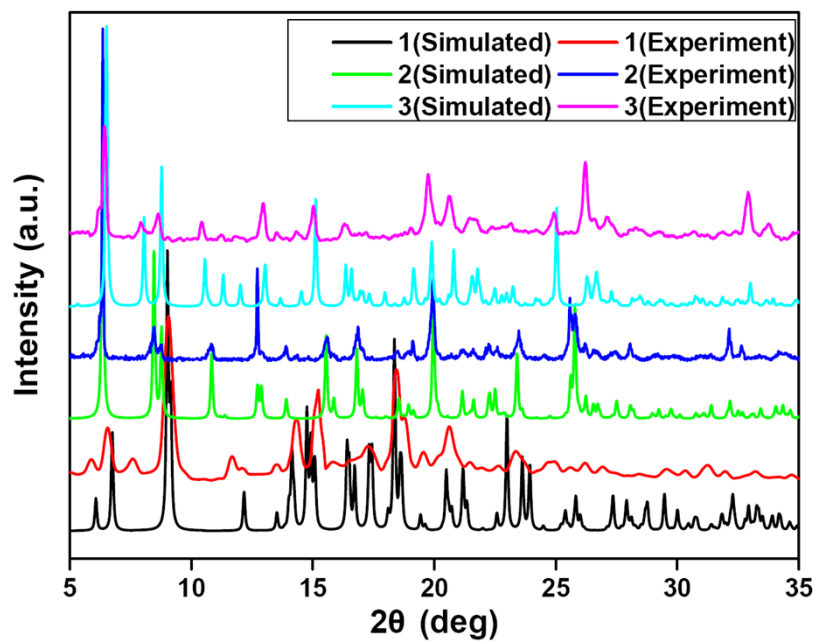

(a)

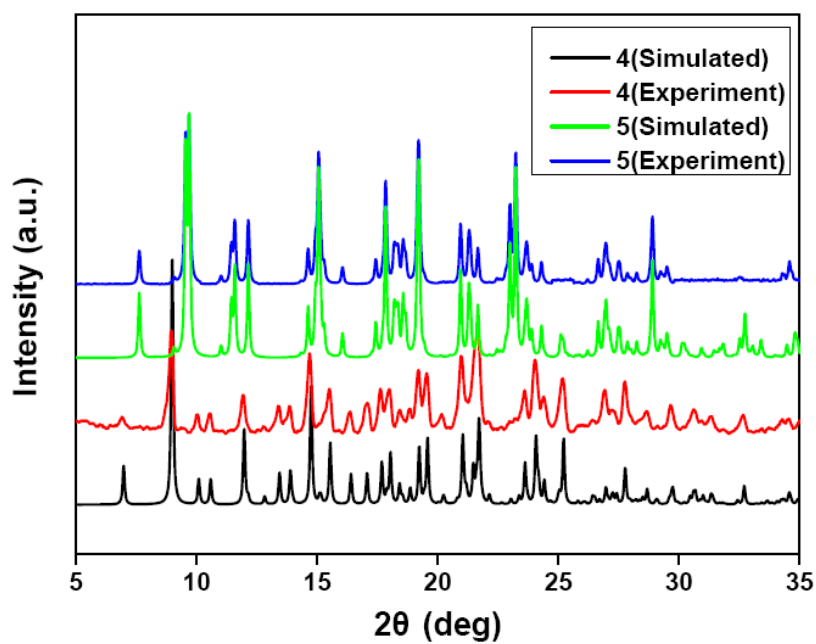

(b)

Figure S1. (a-b) Experimental and simulated PXRd patterns for 1–5.

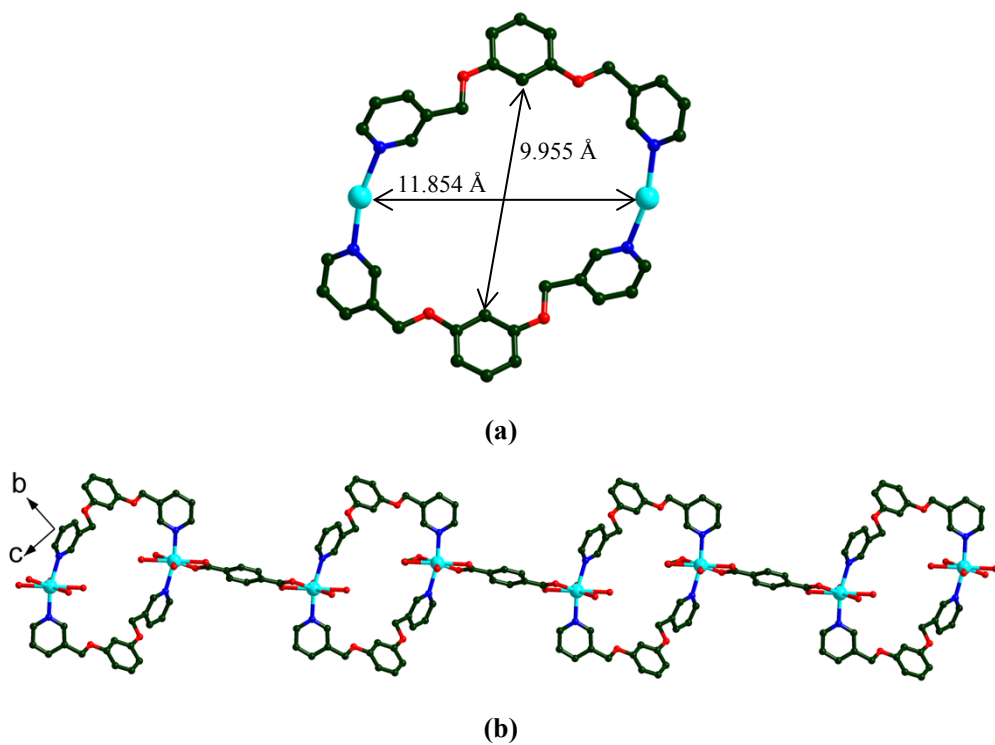

**Figure S2.** (a) View of the  $[\text{Cd}_2(\text{bpmb})_2]$  28-membered ring in **1**. (b) View of the 1D ringed ribbon-like chain in **1**.

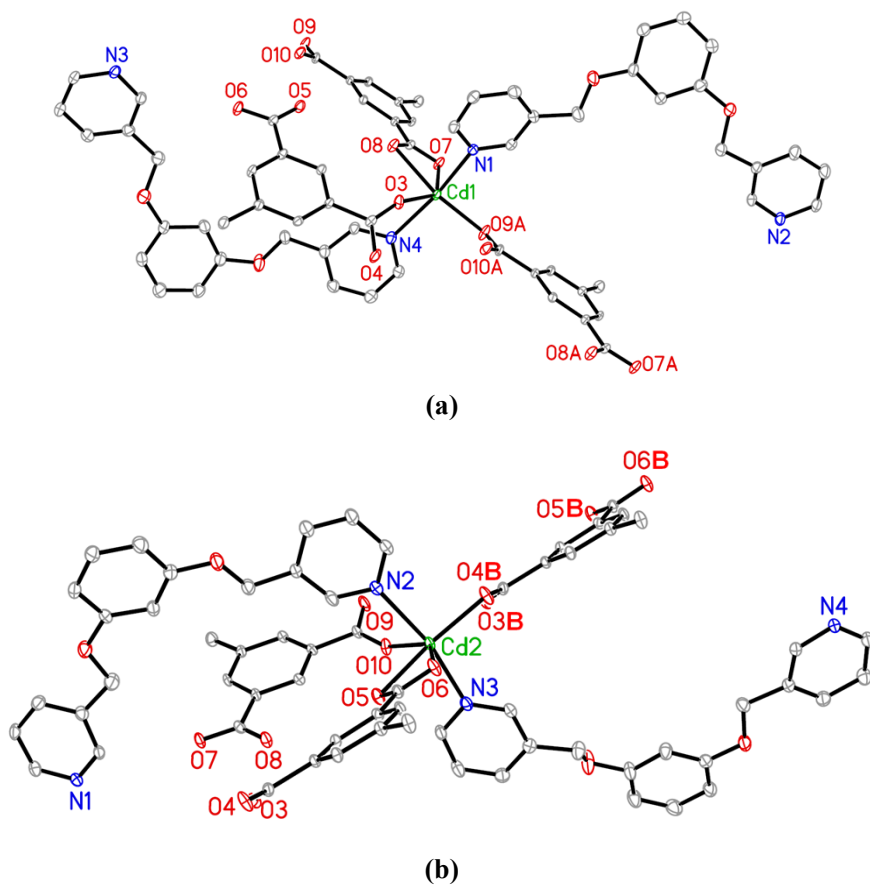

**Figure S3.** (a-b) View of the coordination environments of Cd center in **3** with labeling schemes. Symmetry codes: (A)  $-1 + x, y, z$ ; (B)  $1 + x, y, z$ .

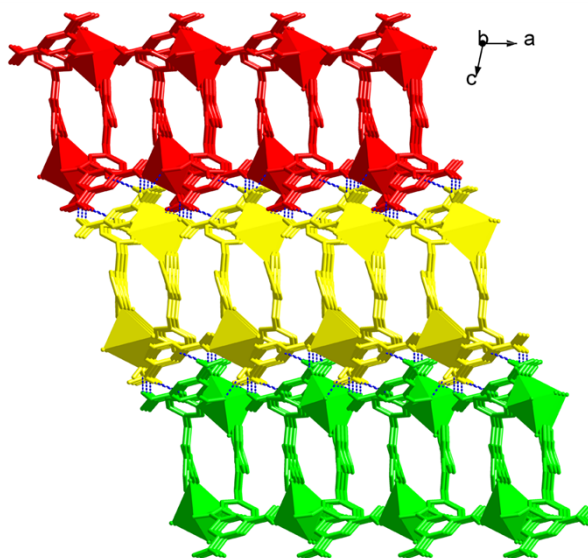

**Figure S4.** View of the 3D supramolecular network of **4**.

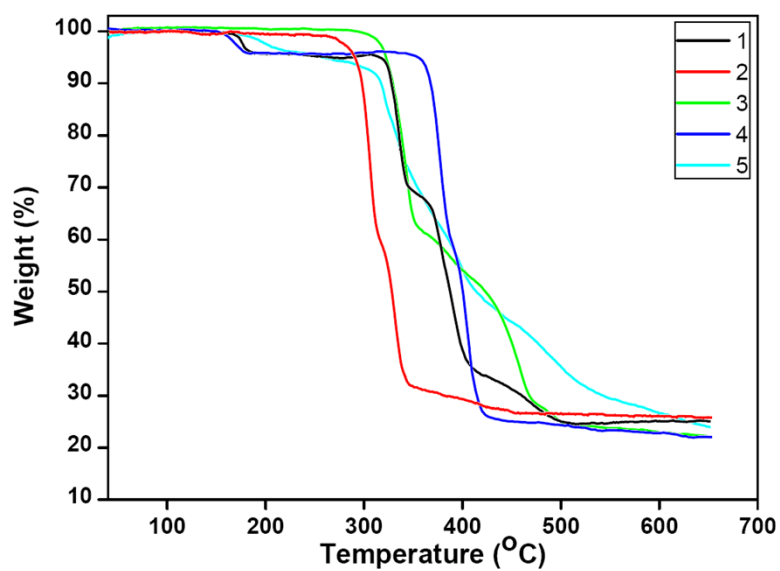

**Figure S5.** The TGA curves for **1-5**.

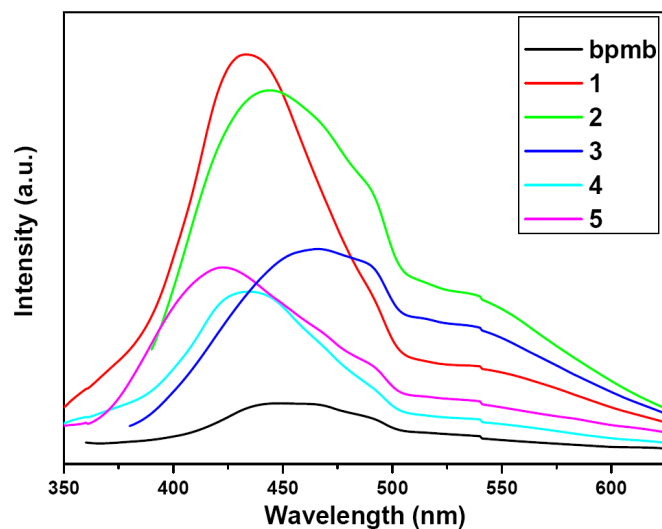

**Figure S6.** Emission spectra of bpmb and 1–5 in the solid state at ambient temperature.

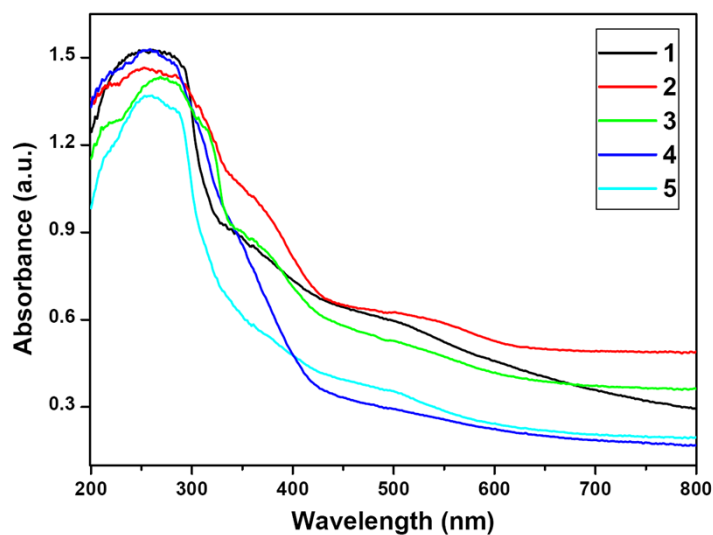

**Figure S7.** UV-vis adsorption spectra of 1–5 in the solid state at ambient temperature.

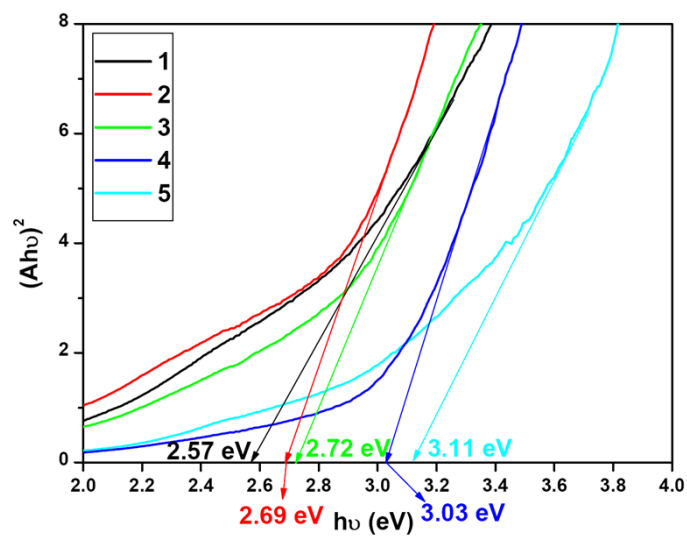

**Figure S8.**  $(Ah\nu)^2$ - $h\nu$  curves of 1–5.
